# Supplementary material for: Experimental atopic dermatitis depends on IL-33R signaling via MyD88 in dendritic cells
Source: PubMed Central journal article supplement (PMC5477596; doi:10.1038/cddis.2017.90), 2017-04-06
Supplement: cddis201790x1.pdf [file cddis201790x1.pdf]

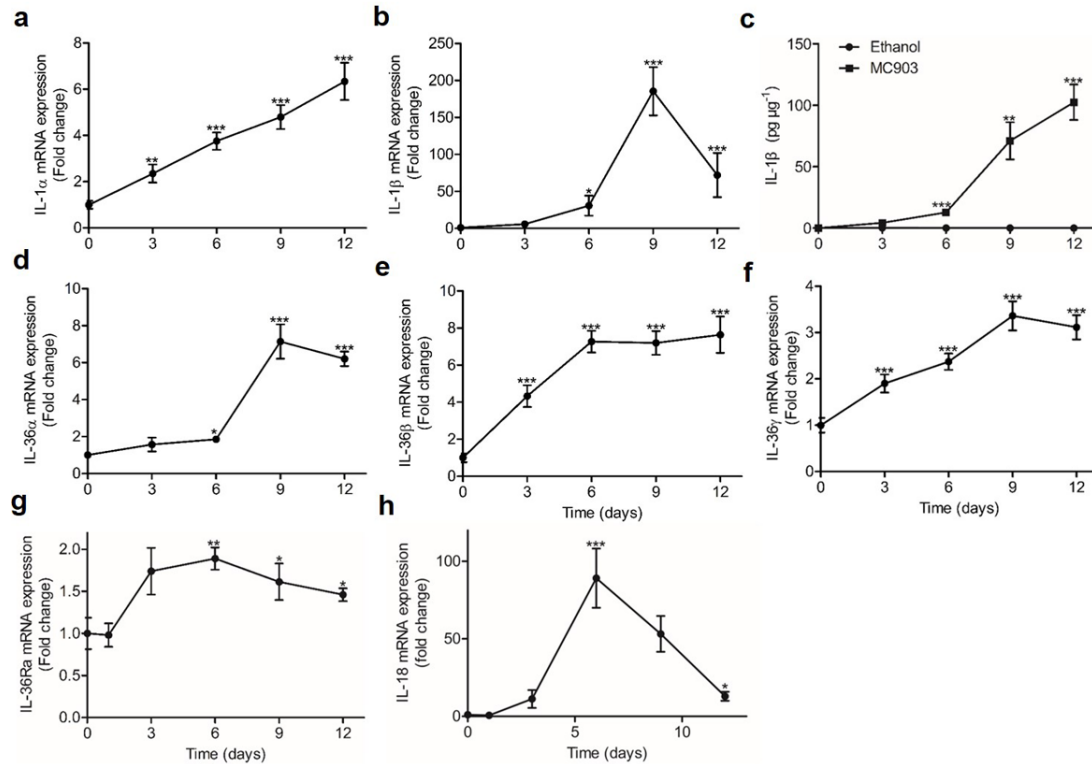

**Supplementary figure 1. Expression of IL-1 and IL-36 induced by MC903. (a&b)**

Quantification of *IL-1 $\alpha$*  (a) and *IL-1 $\beta$*  (b) mRNA expression in BL6 mouse ears for different times. (c) IL-1 $\beta$  protein expression in ears treated by ethanol or MC903. (d-g) Quantification of *IL-36 $\alpha$*  (d), *IL-36 $\beta$*  (e), *IL-36 $\gamma$*  (f), *IL-36Ra* (g) and *IL-18* expression in BL6 mouse ears for different times. \* $P < 0.05$ , \*\* $P < 0.01$ , \*\*\* $P < 0.001$ . P values were analyzed by one-way ANOVA in (a&b, d-g) or two-way ANOVA in (c). All data are representative of two to three independent experiments with  $n = 4-5$  per group and are means  $\pm$  SEM.

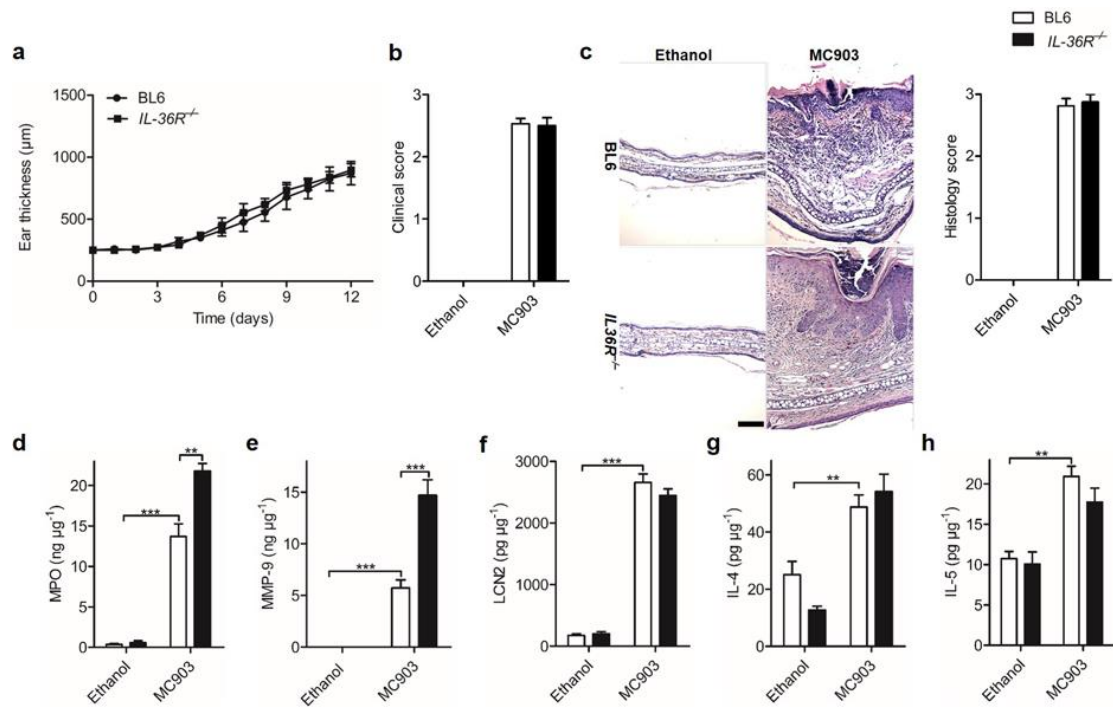

**Supplementary figure 2. IL-36R signal pathway is not essential for MC903-induced AD syndrome.** (a) The ear thickness of BL6 and IL-36R<sup>-/-</sup> mice after daily MC903 treatment. (b&c) Clinical score of the ear redness and scaling (b) and H&E staining of the ears (c) of BL6 and IL-36R<sup>-/-</sup> mice treated by ethanol or MC903 at day 12. Scale bar represents 50µm. (d-h) The protein expression of MPO (d), MMP-9 (e), LCN2 (f), IL-4 (g) and IL-5 (h) in the ear of BL6 and IL-36R<sup>-/-</sup> mice treated by ethanol or MC903 at day 12. \*\* $P < 0.01$ , \*\*\* $P < 0.001$ . P values were analyzed by one-way ANOVA in (d-h). All data are representative of two to three independent experiments with n=4-7 per group and are means  $\pm$  SEM.

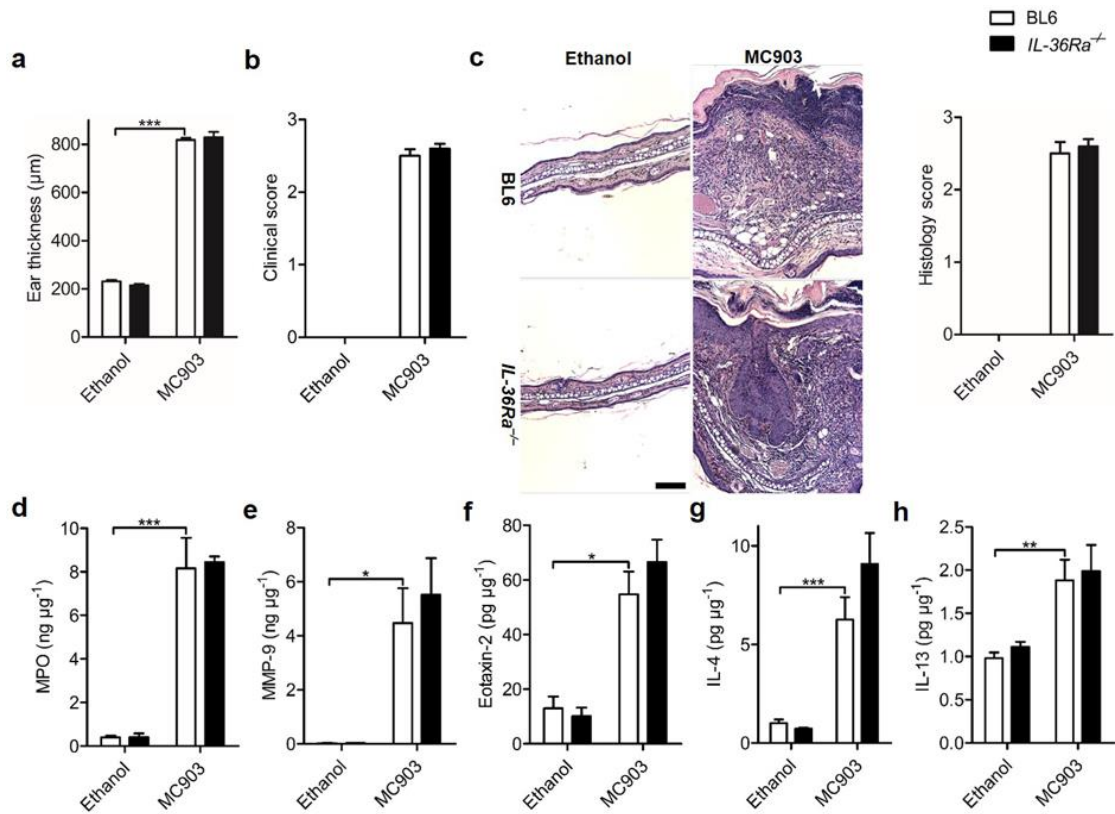

**Supplementary figure 3 IL-36Ra signal pathway is not essential for MC903-induced AD syndrome.** (a-c) Ear thickness (a), clinical score of ear redness and scaling (b) and H&E staining of the ears (c) of BL6 and *IL-36Ra*<sup>-/-</sup> mice treated by Ethanol or MC903 at day 12. Scale bar represents 50 μm. (d-h) The protein expression of MPO (d), MMP-9 (e), eotaxin-2 (f), IL-4 (g) and IL-13 (h) in the ears of BL6 and *IL-36Ra*<sup>-/-</sup> mice treated by ethanol or MC903 at day 12. \*\**P* < 0.01, \*\*\**P* < 0.001. *P* values were analyzed by one-way ANOVA in (d-h). All data are representative of two to three independent experiments with *n*=4-7 per group and are means ± SEM.

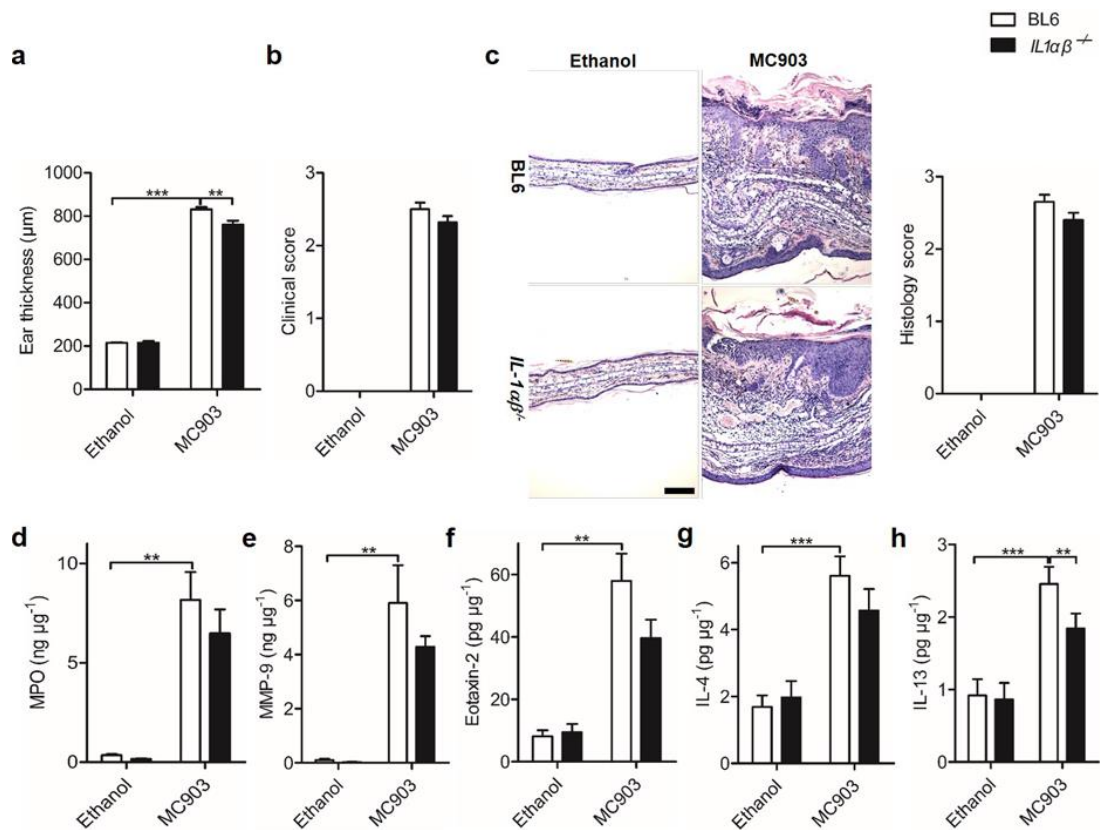

**Supplementary figure 4. *IL-1α/β* plays a minor role in MC903-induced AD syndrome.** (a-c) Ear thickness (a), clinical score of ear redness and scaling (b) and H&E staining of the ears (c) of BL6 and *IL-1αβ*<sup>-/-</sup> mice treated by ethanol or MC903 at day 12. Scale bar represents 50μm. (d-h) The protein expression of MPO (d), MMP-9 (e), eotaxin-2 (f), IL-4 (g) and IL-13 (h) in the ear of BL6 and *IL-1αβ*<sup>-/-</sup> mice treated by Ethanol or MC903 at day 12. \*\**P*<0.01, \*\*\**P*<0.001. P values were analyzed by two-way ANOVA in (a, d-h). All data are representative of two to three independent experiments with n=7-8 per group and are means ± SEM.

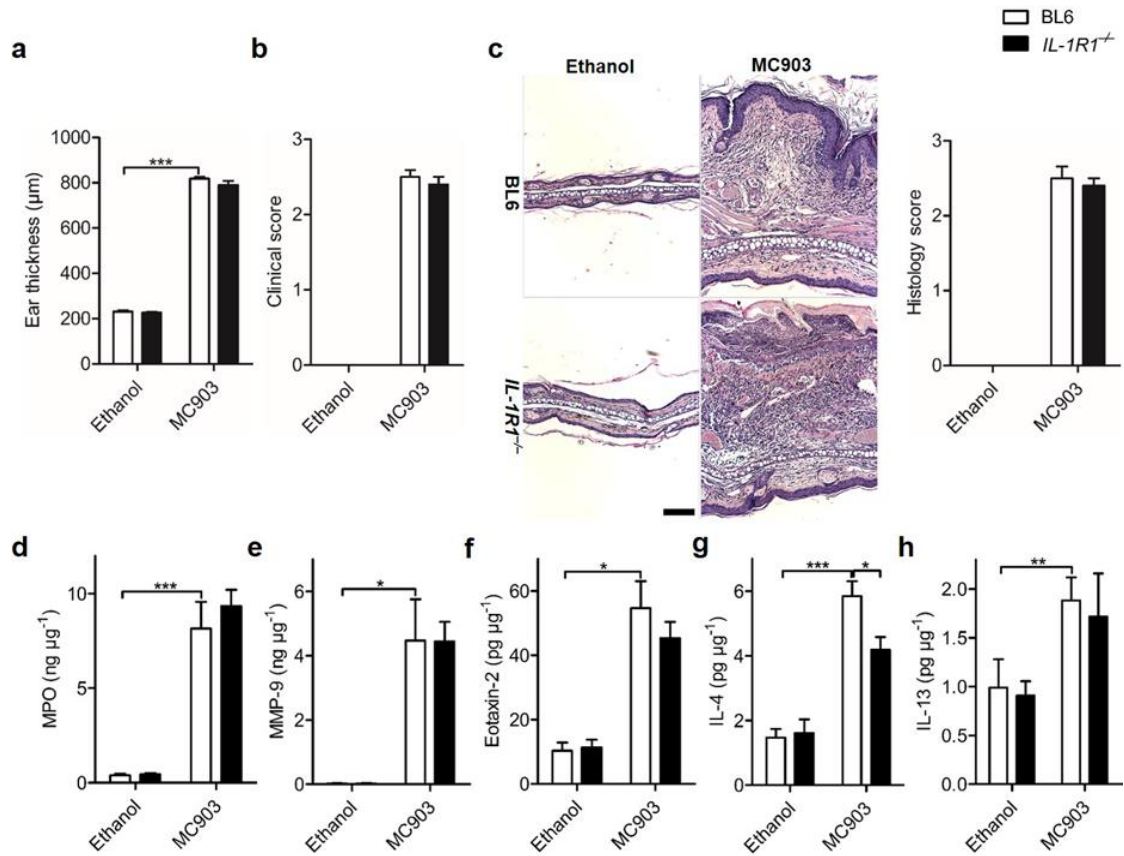

**Supplementary figure 5. IL-1R signal pathway plays a minor role in MC903-induced AD syndrome.** (a-c) Ear thickness (a), clinical score of ear redness and scaling (b) and H&E staining of the ears (c) of BL6 and *IL-1R1*<sup>-/-</sup> mice treated by Ethanol or MC903 at day 12. Scale bar represents 50  $\mu\text{m}$ . (d-h). The protein level of MPO (d), MMP-9 (e), eotaxin-2 (f), IL-4 (g) and IL-13 (h) in the ear of BL6 and *IL-1R1*<sup>-/-</sup> mice treated by Ethanol or MC903 at day 12. \* $P < 0.05$ , \*\* $P < 0.01$ , \*\*\* $P < 0.001$ . P values were analyzed by two-way ANOVA in (a, d-h). All data are representative of two to three independent experiments with  $n = 7-8$  per group and are means  $\pm$  SEM.
